# Supplementary material for: GCR1 Positively Regulates UV-B- and Ethylene-Induced Stomatal Closure via Activating GPA1-Dependent ROS and NO Production
Source: MDPI journal article supplement (doi:10.3390/ijms23105512), 2022-05-15
Supplement: s1 [file s1]

## Supplementary materials

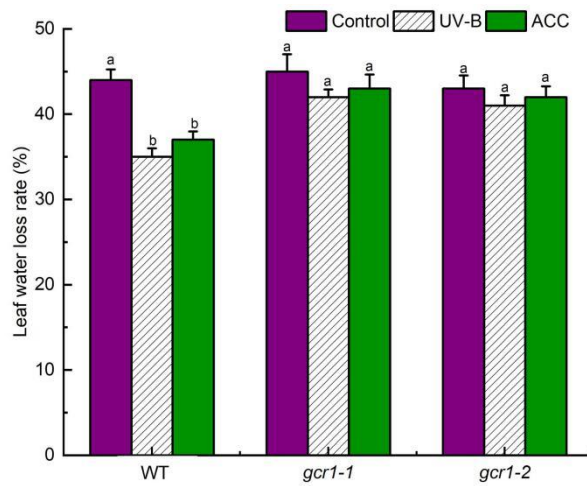

**Figure S1.** Effect of UV-B and ACC on the leaf water loss rate in wild-type Col-0 (WT) and *gcr1* mutants. The leaf water loss rate was calculated after leaves pretreated with MES buffer alone or with 100  $\mu\text{mol/L}$  ACC (ACC) under white light (0.1  $\text{mmol/m}^2/\text{s}$ ) alone or supplemented with 0.5  $\text{W/m}^2$  UV-B radiation (UV-B) for 3 h were placed under light without MES buffer for 2 h. Data are shown as the means  $\pm$  SE of ten leaves.

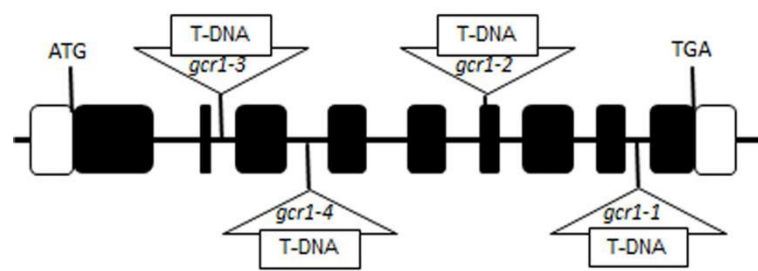

**Figure S2.** T-DNA insertion mutant alleles of GCR1 in Arabidopsis. Boxes and lines represent exons and introns, respectively (figure not drawn to the scale).

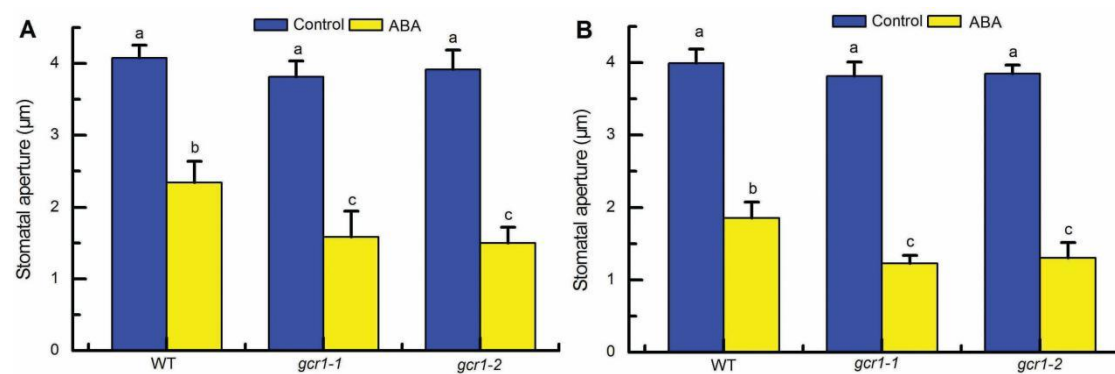

**Figure S3.** GCR1 plays a negative role in ABA inhibition of stomatal opening and promoting of stomatal closure. (A) Leaves of the WT and *gcr1* mutants were incubated in MES buffer under darkness for 3 h to close the stomata, and then incubated in MES buffer alone (Control) or containing 10  $\mu\text{mol/L}$  ABA (ABA) for 3 h under the light. (B) Leaves of the WT and *gcr1* mutants with open stomata were incubated in MES buffer alone (Control) or containing 10  $\mu\text{mol/L}$  ABA (ABA) for 3 h under the light. After treatments, stomatal apertures were measured in epidermal strips taken from the abaxial surfaces of the treated

leaves. Data are presented as means  $\pm$  SE of three independent experiments, each with 30 stomata. Means with different letters are significantly different at  $p < 0.01$ .
